# Supplementary material for: Exploring gene-environment interactions in Parkinson’s disease
Source: Springer Nature journal article supplement (doi:10.1007/s00439-008-0466-z), 2008-01-21
Supplement: MOESM1 [file 439_2008_466_MOESM1_ESM.doc]

**Table S1**. Numbers of PD cases and controls stratified by interactive genotypes and exposures.

To show numbers of subjects in a tabulated form here, we collapsed exposure levels into four bins. For data analysis, however, exposures and age were treated as continuous variables.

| **Genotype** | **Subject type** | **Total N** | **No exposure** | **Low exposure** | **Moderate exposure** | **High exposure** |
| --- | --- | --- | --- | --- | --- | --- |
| ***APOE*** |  |  | **0 ccy**a | **< 60 ccy** | **60 - 126 ccy** | **> 126 ccy** |
|  | Control | 405 | 61 | 167 | 96 | 81 |
| PD | 564 | 88 | 251 | 139 | 86 |
|  | Control | 91 | 8 | 31 | 24 | 28 |
| PD | 142 | 25 | 67 | 32 | 18 |
|  | Control | 168 | 24 | 71 | 43 | 30 |
| PD | 226 | 42 | 101 | 56 | 27 |
| **REP1** |  |  | **0 py**b | **< 15 py** | **15 - 34 py** | **> 34 py** |
| 259.259 | Control | 300 | 171 | 68 | 33 | 28 |
| PD | 410 | 206 | 115 | 55 | 34 |
| 257.* | Control | 310 | 151 | 73 | 45 | 41 |
| PD | 414 | 245 | 94 | 47 | 28 |
| 261.* | Control | 54 | 28 | 10 | 2 | 14 |
| PD | 108 | 66 | 30 | 11 | 1 |

a ccy: coffee-cup years. The 50th percentile and 80th percentiles for ccy in coffee drinkers was 60 ccy and 126 ccy, respectively.

b py: pack-years. The 50th percentile and 80th percentiles for py in cigarette smokers was 15 py and 34 py, respectively.

**Table S2**. Effect of an unmeasured confounder on odds ratio (OR) and upper and lower confidence interval bounds.

As an example, we present the effect of unmeasured confounder on the OR of 60 ccy (50th percentile for coffee consumption) vs. no coffee consumption, among *APOE* carriers. Estimated OR=0.594 (95% CI: 0.446-0.788, *p*<0.001). The confounder is assumed to be binary. G: the relative risk of disease associated with the unmeasured confounder. P0: the prevalence of the unmeasured confounder in the unexposed (ccy=0) population. P1: the prevalence of the unmeasured confounder in the exposed (ccy=60) population.

| **Adjusted Odds Ratio (*** Estimated OR) | | | | | | | |
| --- | --- | --- | --- | --- | --- | --- | --- |
| **G** | **P1** | **P0** | | | | | |
| **0** | **0.2** | **0.4** | **0.6** | **0.8** | **1** |
| 1.5 | 0 | **0.59*** | 0.65 | 0.71 | 0.77 | 0.83 | 0.89 |
| 0.1 | 0.57 | 0.62 | 0.68 | 0.74 | 0.79 | 0.85 |
| 0.2 | 0.54 | 0.59 | 0.65 | 0.70 | 0.76 | 0.81 |
| 0.3 | 0.52 | 0.57 | 0.62 | 0.67 | 0.72 | 0.77 |
| 0.4 | 0.50 | 0.54 | 0.59 | 0.64 | 0.69 | 0.74 |
| 0.5 | 0.48 | 0.52 | 0.57 | 0.62 | 0.67 | 0.71 |
| 2 | 0 | 0.59 | 0.71 | 0.83 | 0.95 | 1.07 | 1.19 |
| 0.1 | 0.54 | 0.65 | 0.76 | 0.86 | 0.97 | 1.08 |
| 0.2 | 0.50 | 0.59 | 0.69 | 0.79 | 0.89 | 0.99 |
| 0.3 | 0.46 | 0.55 | 0.64 | 0.73 | 0.82 | 0.91 |
| 0.4 | 0.42 | 0.51 | 0.59 | 0.68 | 0.76 | 0.85 |
| 0.5 | 0.40 | 0.48 | 0.55 | 0.63 | 0.71 | 0.79 |
| 4 | 0 | 0.59 | 0.95 | 1.31 | 1.66 | 2.02 | 2.38 |
| 0.1 | 0.46 | 0.73 | 1.01 | 1.28 | 1.55 | 1.83 |
| 0.2 | 0.37 | 0.59 | 0.82 | 1.04 | 1.26 | 1.49 |
| 0.3 | 0.31 | 0.50 | 0.69 | 0.88 | 1.06 | 1.25 |
| 0.4 | 0.27 | 0.43 | 0.59 | 0.76 | 0.92 | 1.08 |
| 0.5 | 0.24 | 0.38 | 0.52 | 0.67 | 0.81 | 0.95 |
| **Adjusted Lower 95% Bound (*** Estimated) | | | | | | | |
| **G** | **P1** | **P0** | | | | | |
| **0** | **0.2** | **0.4** | **0.6** | **0.8** | **1** |
| 1.5 | 0 | **0.45*** | 0.49 | 0.54 | 0.58 | 0.62 | 0.67 |
| 0.1 | 0.42 | 0.47 | 0.51 | 0.55 | 0.59 | 0.64 |
| 0.2 | 0.41 | 0.45 | 0.49 | 0.53 | 0.57 | 0.61 |
| 0.3 | 0.39 | 0.43 | 0.47 | 0.50 | 0.54 | 0.58 |
| 0.4 | 0.37 | 0.41 | 0.45 | 0.48 | 0.52 | 0.56 |
| 0.5 | 0.36 | 0.39 | 0.43 | 0.46 | 0.50 | 0.54 |
| 2 | 0 | 0.45 | 0.54 | 0.62 | 0.71 | 0.80 | 0.89 |
| 0.1 | 0.41 | 0.49 | 0.57 | 0.65 | 0.73 | 0.81 |
| 0.2 | 0.37 | 0.45 | 0.52 | 0.59 | 0.67 | 0.74 |
| 0.3 | 0.34 | 0.41 | 0.48 | 0.55 | 0.62 | 0.69 |
| 0.4 | 0.32 | 0.38 | 0.45 | 0.51 | 0.57 | 0.64 |
| 0.5 | 0.30 | 0.36 | 0.42 | 0.48 | 0.54 | 0.59 |
| 4 | 0 | 0.45 | 0.71 | 0.98 | 1.25 | 1.52 | 1.78 |
| 0.1 | 0.34 | 0.55 | 0.75 | 0.96 | 1.17 | 1.37 |
| 0.2 | 0.28 | 0.45 | 0.61 | 0.78 | 0.95 | 1.12 |
| 0.3 | 0.23 | 0.38 | 0.52 | 0.66 | 0.80 | 0.94 |
| 0.4 | 0.20 | 0.32 | 0.45 | 0.57 | 0.69 | 0.81 |
| 0.5 | 0.18 | 0.29 | 0.39 | 0.50 | 0.61 | 0.71 |
| **Adjusted Upper 95% Bound** (* Estimated). | | | | | | | |
| **G** | **P1** | **P0** | | | | | |
| **0** | **0.2** | **0.4** | **0.6** | **0.8** | **1** |
| 1.5 | 0 | **0.79*** | 0.87 | 0.95 | 1.02 | 1.10 | 1.18 |
| 0.1 | 0.75 | 0.83 | 0.90 | 0.98 | 1.05 | 1.13 |
| 0.2 | 0.72 | 0.79 | 0.86 | 0.93 | 1.00 | 1.07 |
| 0.3 | 0.69 | 0.75 | 0.82 | 0.89 | 0.96 | 1.03 |
| 0.4 | 0.66 | 0.72 | 0.79 | 0.85 | 0.92 | 0.99 |
| 0.5 | 0.63 | 0.69 | 0.76 | 0.82 | 0.88 | 0.95 |
| 2 | 0 | 0.79 | 0.95 | 1.10 | 1.26 | 1.42 | 1.58 |
| 0.1 | 0.72 | 0.86 | 1.00 | 1.15 | 1.29 | 1.43 |
| 0.2 | 0.66 | 0.79 | 0.92 | 1.05 | 1.18 | 1.31 |
| 0.3 | 0.61 | 0.73 | 0.85 | 0.97 | 1.09 | 1.21 |
| 0.4 | 0.56 | 0.68 | 0.79 | 0.90 | 1.01 | 1.13 |
| 0.5 | 0.53 | 0.63 | 0.74 | 0.84 | 0.95 | 1.05 |
| 4 | 0 | 0.79 | 1.26 | 1.73 | 2.21 | 2.68 | 3.15 |
| 0.1 | 0.61 | 0.97 | 1.33 | 1.70 | 2.06 | 2.42 |
| 0.2 | 0.49 | 0.79 | 1.08 | 1.38 | 1.67 | 1.97 |
| 0.3 | 0.41 | 0.66 | 0.91 | 1.16 | 1.41 | 1.66 |
| 0.4 | 0.36 | 0.57 | 0.79 | 1.00 | 1.22 | 1.43 |
| 0.5 | 0.32 | 0.50 | 0.69 | 0.88 | 1.07 | 1.26 |
